# Supplementary material for: Asymmetric aza-[2,3]-Wittig sigmatropic rearrangements: chiral auxiliary control and formal asymmetric synthesis of (2S, 3R, 4R)-4-hydroxy-3-methylproline and (–)-kainic acid
Source: Royal Society of Chemistry journal article supplement (doi:10.1039/b506198a), 2005-01-01
Supplement: b506198a.pdf [file b506198a.pdf]

## Asymmetric aza-[2,3]-Wittig sigmatropic rearrangements: chiral auxiliary control and formal asymmetric synthesis of (2*S*, 3*R*, 4*R*)-4-hydroxy- 3-methylproline and (-)-kainic acid.

James C. Anderson,<sup>\*a</sup> Julian M.A. O'Loughlin<sup>a</sup> and James A. Tornos<sup>b</sup>

<sup>a</sup> School of Chemistry, University of Nottingham, Nottingham, NG7 2RD, UK. Fax: +44(0)115 9513564; Tel: +44(0)115 9514194; E-mail: [j.anderson@nottingham.ac.uk](mailto:j.anderson@nottingham.ac.uk)

<sup>b</sup> AstraZeneca, Process Research and Development Charnwood, Bakewell Road, Loughborough, LE11 5RH, UK.

[j.anderson@nottingham.ac.uk](mailto:j.anderson@nottingham.ac.uk)

Synthesis of chiral auxiliary aza-[2,3]-Wittig precursors **21-33**.

### [*N*-Boc-[2-(dimethylphenylsilyl)-but-2-enyl]-amino]-acetic acid [1*R*,2*S*,5*R*]-menthol ester **21**

In an identical procedure to the preparation of **12** the acid derived from **14** (1.4 g, 3.9 mmol) and (-)-menthol (610 mg, 3.9 mmol) gave a crude product which was purified by flash column chromatography (10 % EtOAc/pet. ether) to give **21** (1.58 g, 81 %) as a colourless oil;  $\nu_{\max}(\text{film})/\text{cm}^{-1}$  2956, 2870, 1748, 1701;  $\delta_{\text{H}}$  (500 MHz;  $\text{CDCl}_3$ ) 0.41 (6H, s,  $\text{SiMe}_2$ ), 0.75-0.77 (3H, m,  $\text{CH}_3\text{CH}$ ), 0.88-0.92 (6H, m,  $\text{CMe}_2\text{CH}$ ), 0.96-2.04 (21H, m,  $\text{CH}_2\text{CH}(\text{C})\text{OR} + \text{CH}(\text{CH}_3)\text{CH}_2\text{CH}_2 + \text{CH}(\text{CH}_3)\text{CH}_2\text{CH}_2 + \text{CH}_3\text{CH} + \text{CHCMe}_2\text{H} + \text{CHCMe}_2\text{H} + \text{Boc} + \text{CH}_3\text{CH}$ ), 3.67-4.15 (4H, m,  $\text{CH}_2\text{NCH}_2$ ), 4.70-4.77 (1H, m,  $\text{CO}_2\text{CH}$ ), 6.15-6.23 (1H, m,  $\text{C}=\text{CH}(\text{CH}_3)$ ), 7.27-7.34 (3H, m,  $\text{CH}_{\text{Ar}}$ ), 7.50-7.52 (2H, m,  $\text{CH}_{\text{Ar}}$ );  $\delta_{\text{C}}$  (125 MHz;  $\text{CDCl}_3$ ) -1.6, -1.5, -1.5, 16.3, 18.0, 20.8, 22.0, 23.4, 26.2, 26.2, 28.3, 31.4, 34.2, 34.3, 40.9, 41.0, 46.6, 46.7, 47.0, 47.1, 54.0, 54.5, 74.9, 80.0, 80.1, 127.9, 128.9, 129.0, 133.4, 133.6, 133.7, 138.8, 139.0, 141.2, 141.7, 155.2, 155.8, 169.7;  $m/z$  ( $\text{ES}^+$ ) 524 (11,  $\text{MNa}^+$ ), 502.3325 ( $\text{MH}^+$   $\text{C}_{29}\text{H}_{48}\text{NO}_4\text{Si}$  requires 502.3353), 402 (11,  $\text{MH}^+\text{-Boc}$ ), 135 (74,  $\text{PhMe}_2\text{Si}^+$ ), 73 (100,  $\text{O}^t\text{Bu}^+$ ), 57 (78,  $^t\text{Bu}^+$ ).

### [*N*-Boc-[2-(dimethylphenylsilyl)-but-2-enyl]-amino]-acetic acid [1*R*,2*S*]-2-phenyl-cyclohexyl ester **22**

In an identical procedure to the preparation of **12** the acid derived from **14** (1.01 g, 2.79 mmol) and (1*R*,2*S*)-2-phenyl-cyclohexanol (541 mg, 3.07 mmol, 1.1 eq.) gave a crude product which was purified by flash column chromatography (10 % EtOAc/pet. ether) to give **22** (1.20 g, 82 %) as a colourless oil;  $\nu_{\max}(\text{film})/\text{cm}^{-1}$  3028, 2932, 2859, 1736, 1701;  $\delta_{\text{H}}$  (270 MHz;  $\text{CDCl}_3$ ) 0.42 (6H, s,  $\text{SiMe}_2$ ), 1.37-2.28 (20H, m,  $\text{Boc} + \text{CH}_3\text{CH} + \text{CH}_2\text{CH}_2\text{CH}_2\text{CH}_2$ ), 2.66-2.83 (1H, m,  $\text{CHPh}$ ), 3.46-4.10 (4H, m,  $\text{CH}_2\text{NCH}_2$ ), 5.07-5.22 (1H, m,  $\text{CO}_2\text{CH}$ ), 5.67-5.81 (1H, m,  $\text{CHCH}_3$ ), 7.16-7.56 (10H, m,  $\text{CH}_{\text{Ar}}$ );  $\delta_{\text{C}}$  (67.5 MHz;  $\text{CDCl}_3$ ) -1.5, -1.4, 17.9, 24.8, 25.9, 28.4, 32.5, 34.4, 46.1, 46.2, 19.9, 50.1, 54.0, 54.4, 76.3, 76.4, 79.8, 80.0, 126.5, 127.6, 127.9, 128.5, 128.9, 129.0, 133.1, 133.6, 138.9, 139.1, 141.8, 142.6, 146.1, 155.1, 155.7, 169.2, 169.5;  $m/z$  ( $\text{ES}^+$ ) 544.2854 (100,  $\text{MNa}^+$   $\text{C}_{31}\text{H}_{43}\text{NO}_4\text{SiNa}$  requires 544.2859), 422 (40,  $\text{MH}^+\text{-Boc}$ ).

**[*N*-Boc-[2-(dimethylphenylsilyl)-but-2-enyl]-amino]-acetic acid [2*R*,1*S*]-2-dimethylamino-1-phenyl-propyl ester **23****

In an identical procedure to the preparation of **12** the acid derived from **14** (184 mg, 0.507 mmol) and *N*-methyl ephedrine (457 mg, 2.54 mmol, 5 eq.) gave a crude product which was purified by flash column chromatography (1% AcOH, 19 % EtOAc/ pet. ether) to give **23** (262 mg, 98 %) as a colourless oil;  $\nu_{\max}(\text{film})/\text{cm}^{-1}$  2976, 1692 (br);  $\delta_{\text{H}}$  (270 MHz;  $\text{CDCl}_3$ ) 0.41-0.43 (6H, s,  $\text{SiMe}_2$ ), 1.06 (d,  $J$  6.7,  $\text{CH}_3\text{CHNMe}_2$ ), 1.38 (9H, m,  $\text{Boc}_{\text{rot}}$ ), 1.48 (9H, m,  $\text{Boc}_{\text{rot}}$ ), 1.64-1.67 (3H, m,  $\text{CH}_3\text{C}(\text{H})=\text{C}$ ), 2.29 (6H, s,  $\text{NMe}_2$ ), 2.92 (1H, m,  $\text{CHNMe}_2$ ), 3.80-4.21 (4H, m,  $\text{CH}_2\text{NCH}_2$ ), 5.98 (1H, d,  $J$  5.5,  $\text{CO}_2\text{CH}$ ), 6.09-6.19 (1H, m,  $\text{C}=\text{CHCH}_3$ ), 7.28-7.32 (8H, m,  $\text{CH}_{\text{Ar}}$ ), 7.50-7.52 (2H, m,  $\text{CH}_{\text{Ar}}$ );  $\delta_{\text{C}}$  (67.5 MHz;  $\text{CDCl}_3$ ) -1.6, -1.5, 9.2, 9.3, 17.9, 18.0, 25.0, 25.7, 26.3, 28.3, 28.3, 28.4, 34.0, 40.8, 41.1, 46.9, 54.0, 54.6, 63.5, 63.8, 75.8, 80.3, 80.4, 126.2, 126.4, 126.8, 127.8, 127.9, 128.0, 128.4, 128.4, 128.9, 129.1, 133.2, 133.5, 133.6, 138.7, 139.0, 139.4, 141.1, 141.6, 155.1, 155.8, 169.2;  $m/z$  ( $\text{ES}^+$ ) 525.3141 (45,  $\text{MH}^+$   $\text{C}_{30}\text{H}_{45}\text{N}_2\text{O}_4\text{Si}$  requires 525.3149), 469 (5,  $\text{MH}^+{}^t\text{Bu}$ ), 162 (99,  $\text{C}_{11}\text{H}_{16}\text{N}^+$ ), 72 (100,  $\text{OBu}^+$ ), 57 (66,  ${}^t\text{Bu}^+$ ).

**[2-(Dimethylphenylsilyl)-but-2-enyl]-[1*R*,2*S*]-[(2-hydroxy-1-methyl-2-phenylethyl)-methyl-carbamoyl]-methyl-carbamic acid *tert*-butyl ester **24****

A solution of the acid derived from **14** (429 mg, 1.18 mmol) in THF (23 mL) was cooled to -30 °C and treated with (1*R*, 2*S*)-(-)-ephedrine (195 mg, 1.18 mmol), DCC (248 mg, 1.18 mmol, 1.0 eq.) and HOBt (159 mg, 1.18 mmol, 1.0 eq.), warmed to rt and stirred for 26 h. The reaction was then heated to reflux and stirred for a further 14 h. The reaction was cooled to rt and the solvent removed *in vacuo* and replaced with EtOAc (25 mL). The resultant suspension was filtered *via* Celite® and solvent removed *in vacuo* to furnish the crude product which was purified by flash column chromatography (45 % EtOAc/pet. ether) to give **24** (390 mg, 65 %) as a colourless oil;  $\nu_{\max}(\text{film})/\text{cm}^{-1}$  3360, 2918, 1698, 1666;  $\delta_{\text{H}}$  (400 MHz;  $\text{CDCl}_3$ ) 0.40 (6H, s,  $\text{SiMe}_2$ ), 1.06-1.09 (3H, m,  $\text{CH}_3\text{CHNMe}$ ), 1.41-1.44 (9H, m,  $\text{Boc}$ ), 1.65-1.67 (3H, m,  $\text{C}=\text{CHCH}_3$ ), 2.60 (3H, br s,  $\text{NMe}_{\text{major rot}}$ ), 2.76 (3H, br s,  $\text{NMe}_{\text{minor rot}}$ ), 3.15-4.82 (6H, m,  $\text{CHNMe} + \text{CHPh} + \text{CH}_2\text{NCH}_2$ ), 6.00-6.15 (1H, m,  $\text{C}=\text{CHCH}_3$ ), 7.24-7.35 (8H, m,  $\text{CH}_{\text{Ar}}$ ), 7.48-7.50 (2H, m,  $\text{CH}_{\text{Ar}}$ );  $\delta_{\text{C}}$  (67.5 MHz;  $\text{CDCl}_3$ ) -1.5, -1.4, 11.9, 17.8, 25.0, 25.6, 28.3, 31.5, 31.9, 46.6, 46.8, 54.3, 54.4, 57.5, 76.8, 77.0, 79.6, 80.0, 126.0, 126.3, 127.4, 127.5, 127.8, 128.1, 128.4, 127.7, 128.9, 133.6, 139.9, 141.2, 141.8, 155.1, 156.2, 168.4, 169.9, 170.1.  $m/z$  ( $\text{ES}^+$ ) 533 (13,  $\text{MNa}^+$ ), 511.3018 (100,  $\text{MH}^+$   $\text{C}_{29}\text{H}_{43}\text{N}_2\text{O}_4\text{Si}$  requires 511.2992), 455 (25,  $\text{MH}^+{}^t\text{Bu}$ ), 411 (21,  $\text{MH}^+{}^t\text{Boc}$ ).

**[1*R*,2*S*]-[(2-(*tert*-Butyldimethylsilyloxy)-1-methyl-2-phenylethyl)-methylcarbamoyl]-methyl-[2-(dimethylphenylsilyl)-but-2-enyl]-carbamic acid *tert*-butyl ester **25****

A solution of the acid derived from **14** (490 mg, 1.35 mmol) in  $\text{CH}_2\text{Cl}_2$  (7 mL) was cooled to -30 °C and treated with (1*R*, 2*S*)-(-)-*O*-*t*-butyldimethylsilylephedrine (377 mg, 1.35 mmol), DCC (284 mg, 1.35 mmol, 1.0 eq.) and HOBt (182 mg, 1.35 mmol, 1.0 eq.), warmed to rt over 1 h and then refluxed for a further 12 h or until tlc analysis showed no starting material. The reaction was cooled to rt and the solvent removed *in vacuo* and replaced with EtOAc (15 mL). The resultant suspension was filtered *via* Celite® and solvent removed *in vacuo* to furnish the crude product which was purified by flash column chromatography (20 % EtOAc/pet. ether) to give **25** (481 mg, 57 %) as a colourless oil;  $\nu_{\max}(\text{film})/\text{cm}^{-1}$  3068, 2956, 2930, 2858, 1694, 1657;  $\delta_{\text{H}}$  (500 MHz;  $\text{CDCl}_3$ ) -0.25-(-0.23) (3H, m,  $\text{SiMe}_2{}^t\text{Bu}$ ), 0.02-0.06 (3H, m,  $\text{SiMe}_2{}^t\text{Bu}$ ), 0.40-0.46 (6H, s,  $\text{SiMe}_2\text{Ph}$ ), 0.93 (9H, br s,  $\text{SiMe}_2{}^t\text{Bu}$ ), 1.13-1.92 (16H, m,  $\text{NMeCH} + \text{C}=\text{C}(\text{H})\text{CH}_3 + \text{CH}_3\text{CHNMe} + \text{Boc}$ ), 2.70-2.87 (3H, m,  $\text{NMe}$ ), 3.45-4.92 (5H, m,  $\text{CHPh} + \text{CH}_2\text{NCH}_2$ ),

6.02-6.28 (1H, m, C=CHCH<sub>3</sub>), 7.22-7.30 (4H, m, CH<sub>Ar</sub>), 7.37-7.39 (4H, m, CH<sub>Ar</sub>), 7.53-7.55 (2H, m, CH<sub>Ar</sub>); δ<sub>C</sub> (125 MHz; CDCl<sub>3</sub>) -5.2, -4.7, -4.6, -1.7, -1.6, -1.5, -1.4, -1.3, 11.3, 14.5, 17.8, 18.0, 18.0, 25.5, 25.8, 26.2, 28.3, 30.6, 32.4, 46.6, 46.7, 46.9, 54.2, 54.3, 54.4, 58.4, 76.6, 79.4, 79.6, 79.7, 126.2, 126.4, 127.1, 127.2, 127.8, 128.2, 128.7, 128.8, 133.5, 133.6, 134.2, 138.1, 139.0, 139.4, 140.9, 141.8, 142.5, 155.6, 156.1, 168.3, 168.5; m/z (ES<sup>+</sup>) 647 (4, MNa<sup>+</sup>), 625.3816 (42, MH<sup>+</sup> C<sub>35</sub>H<sub>57</sub>N<sub>2</sub>O<sub>4</sub>Si requires 625.3857), 525 (100, MH<sup>+</sup>-Boc), 135 (84, PhMe<sub>2</sub>Si<sup>+</sup>), 73 (93, O<sup>t</sup>Bu<sup>+</sup>), 57 (35, <sup>t</sup>Bu<sup>+</sup>).

**[2-(Dimethylphenylsilyl)-but-2-enyl]-[2S]-[2-(2-hydroxymethylpyrrolidin-1-yl)-2-oxo-ethyl]-carbamic acid *tert*-butyl ester **26****

In an identical procedure to the preparation of **25** the acid derived from **14** (236 mg, 0.650 mmol) and (*S*)-pyrrolidine methanol (65 μL, 0.65 mmol, 1.0 eq.) gave a crude product which was purified by flash column chromatography (20 % EtOAc/ pet. ether) to give **26** (284 mg, 98 %) as a colourless oil; ν<sub>max</sub>(film)/cm<sup>-1</sup> 3392, 2973, 1694, 1635; δ<sub>H</sub> (500 MHz; CDCl<sub>3</sub>) 0.41 (6H, s, SiMe<sub>2</sub>), 1.42-1.44 (9H, m, *Boc*), 1.57-1.59 (1H, m, NCH<sub>2</sub>CH<sub>2</sub>CH<sub>2</sub>), 1.67-1.71 (3H, m, CH<sub>3</sub>C(H)C=C), 1.82-2.03 (3H, m, NCH<sub>2</sub>CH<sub>2</sub>CH<sub>2</sub>), 3.30-4.29 (9H, m, CH<sub>2</sub>NCH<sub>2</sub> + HOCH<sub>2</sub>CH + NCH<sub>2</sub>CH<sub>2</sub>CH<sub>2</sub>), 6.16-6.24 (1H, m, C=CHCH<sub>3</sub>), 7.34-7.37 (3H, m, CH<sub>Ar</sub>), 7.50-7.52 (2H, m, CH<sub>Ar</sub>); δ<sub>C</sub> (125 MHz; CDCl<sub>3</sub>) -1.7, -1.5, 17.9, 24.5, 28.0, 28.3, 47.0, 47.3, 47.5, 54.6, 61.6, 61.7, 66.7, 67.3, 79.9, 80.3, 126.7, 127.8, 127.9, 128.8, 129.0, 133.5, 133.7, 134.3, 138.8, 139.3, 134.3, 138.8, 139.3, 141.4, 155.3, 156.3, 170.0, 170.6; MS (ES<sup>+</sup>): m/z 469 (12, MNa<sup>+</sup>), 447.2685 (100, MH<sup>+</sup> C<sub>24</sub>H<sub>39</sub>N<sub>2</sub>O<sub>4</sub>Si requires 447.2679), 391 (36, MH<sup>+</sup>-<sup>t</sup>Bu), 347 (28, MH<sup>+</sup>-*Boc*).

**[2-(Dimethylphenylsilyl)-but-2-enyl]-[2S]-[2-(2-methoxymethylpyrrolidin-1-yl)-2-oxo-ethyl]-carbamic acid *tert*-butyl ester **27****

In an identical procedure to the preparation of **25** the acid derived from **14** (444 mg, 1.22 mmol) and (*S*)-(+)-methoxymethylpyrrolidine (151 μL, 1.22 mmol) gave a crude product which was purified by flash column chromatography (40 % EtOAc/ pet. ether) to give **27** (514 mg, 91 %) as a colourless oil; ν<sub>max</sub>(film)/cm<sup>-1</sup> 2976, 1690, 1652; δ<sub>H</sub> (400 MHz; CDCl<sub>3</sub>) 0.41 (6H, s, SiMe<sub>2</sub>), 1.41-1.45 (9H, s, *Boc*), 1.65-1.67 (3H, m, C=CHCH<sub>3</sub>), 1.86-2.04 (4H, m, CH<sub>2</sub>CH<sub>2</sub>CH<sub>2</sub>N), 3.19-4.24 (12H, m, CH<sub>2</sub>NCH<sub>2</sub> + MeOCH<sub>2</sub>CHNCH<sub>2</sub>), 6.16-6.23 (1H, m, C=CHCH<sub>3</sub>), 7.34 (3H, m, CH<sub>Ar</sub>), 7.49-7.52 (2H, m, CH<sub>Ar</sub>); δ<sub>C</sub> (100 MHz; CDCl<sub>3</sub>) -1.6, -1.5, 14.2, 17.8, 21.0, 21.5, 21.6, 24.2, 24.3, 27.1, 27.2, 28.4, 28.8, 45.6, 46.2, 46.2, 46.3, 46.8, 47.1, 47.2, 54.3, 54.3, 56.2, 56.7, 58.9, 59.0, 72.2, 72.3, 74.1, 79.5, 79.8, 127.7, 127.8, 128.7, 128.8, 133.6, 138.9, 139.5, 140.8, 155.4, 156.2, 167.4, 167.8; m/z (ES<sup>+</sup>) 483 (22, MNa<sup>+</sup>), 461.2878 (92, MH<sup>+</sup> C<sub>25</sub>H<sub>41</sub>N<sub>2</sub>O<sub>4</sub>Si requires 461.2836), 405 (96, MH<sup>+</sup>-<sup>t</sup>Bu), 361 (100, MH<sup>+</sup>-*Boc*).

**[2-(Dimethylphenylsilyl)-but-2-enyl]-[2S]-[2-[2-(hydroxydiphenylmethyl)-pyrrolidin-1-yl]-2-oxo-ethyl]-carbamic acid *tert*-butyl ester **28****

In an identical procedure to the preparation of **25** the acid derived from **14** (561 mg, 1.54 mmol) and (*S*)-(-)-α,α-diphenyl-2-pyrrolidenemethanol (390 mg, 1.54 mmol) gave a crude product which was purified by flash column chromatography (20 % EtOAc/ pet. ether) to give **28** (596 mg, 65 %) as a colourless oil; ν<sub>max</sub>(film)/cm<sup>-1</sup> 2978, 1688, 1634; δ<sub>H</sub> (400 MHz; CDCl<sub>3</sub>) 0.43 (6H, s, SiMe<sub>2</sub>), 1.40-1.55 (11H, m, CH<sub>2</sub>CH<sub>2</sub>N + *Boc*), 1.70 (3H, d, *J* 6.8, C=CHCH<sub>3</sub>), 1.83-2.07 (2H, m, CH<sub>2</sub>CH<sub>2</sub>CH<sub>2</sub>N), 2.82-2.86 (1H, m, CH<sub>2</sub>CH<sub>2</sub>N), 3.1 (1H, q, *J* 7.6, CH<sub>2</sub>CH<sub>2</sub>N<sub>rot</sub>), 3.25 (1H, q, *J* 7.6, CH<sub>2</sub>CH<sub>2</sub>N<sub>rot</sub>), 3.39-4.37 (4H, m, CH<sub>2</sub>NCH<sub>2</sub>), 5.16 (1H, dd, *J* 4.4, 8.8, Ph<sub>2</sub>C(OH)CH), 6.14-6.18 (1H, m, C=CHCH<sub>3</sub>), 6.51 (1H, br s, OH<sub>rot</sub>), 6.67 (1H, br s, OH<sub>rot</sub>), 7.24-7.37 (13H, m, CH<sub>Ar</sub>), 7.51-7.52 (2H, m, CH<sub>Ar</sub>); δ<sub>C</sub> (100 MHz; CDCl<sub>3</sub>) -1.6, -1.5, -1.3, 18.0, 18.0, 23.3, 28.3, 28.4, 29.1, 29.2, 47.0, 47.1, 47.2, 47.2, 54.2, 54.6, 66.8,

67.1, 80.0, 80.2, 81.6, 81.7, 127.2, 127.4, 127.7, 127.8, 127.9, 128.1, 128.8, 128.9, 133.6, 133.6, 133.7, 134.2, 138.9, 139.3, 141.1, 141.5, 143.5, 146.2, 146.3, 155.5, 156.2, 171.2, 171.5;  $m/z$  ( $ES^+$ ) 621 (11,  $MNa^+$ ), 599.3311 (95,  $MH^+$   $C_{36}H_{47}N_2O_4Si$  requires 599.3305), 581 (100,  $MH^+-H_2O$ ), 543 (18,  $MH^+-^tBu$ ), 525 (61,  $MH^+-H_2O-^tBu$ ), 499 (64,  $MH^+-Boc$ ).

**[2S]-2-(2-[N-Boc-[2-(dimethylphenylsilyl)-but-2-enyl]-amino]-acetoxymethyl)-pyrrolidine -1-carboxylic acid *tert*-butyl ester 29**

In an identical procedure to the preparation of **12** the acid derived from **14** (375 mg, 1.03 mmol) and *N*-Boc-(*S*)-pyrrolidine methanol (207 mg, 1.03 mmol, 1.00 eq.) gave a crude product which was purified by flash column chromatography (30% EtOAc/ pet. ether) to give **29** (471 mg, 84 %) as a colourless oil;  $\nu_{max}(\text{film})/\text{cm}^{-1}$  3068, 2975, 1754, 1693;  $\delta_H$  (400 MHz;  $CDCl_3$ ) 0.37 (6H, s,  $SiMe_2$ ), 1.38-1.42 (19H, m, 2 x *Boc* +  $NCH_2CH_2CH_2$ ), 1.62-1.64 (3H, m,  $CH_3CH$ ), 1.71-2.01 (3H, m,  $NCH_2CH_2CH_2$ ), 3.22-4.21 (11H, m,  $CH_2NCH_2$  +  $CO_2CH_2CH$  +  $NCH_2CH_2CH_2$ ), 6.13-6.18 (1H, m,  $C=CHCH_3$ ), 7.29-7.30 (3H, m,  $CH_{Ar}$ ), 7.43-7.45 (2H, m,  $CH_{Ar}$ );  $\delta_C$  (100 MHz;  $CDCl_3$ ) -2.0, -1.9, -1.8, -1.6, -1.5, -1.4, 17.8, 17.8, 22.9, 23.7, 27.7, 28.0, 28.2, 28.3, 28.3, 28.4, 28.4, 28.5, 28.5, 28.6, 28.6, 28.7, 46.4, 46.5, 46.6, 54.1, 54.5, 55.4, 64.7, 65.0, 77.4, 79.2, 79.6, 80.0, 80.1, 127.7, 127.8, 128.7, 128.8, 133.2, 133.4, 133.5, 133.5, 133.6, 133.6, 138.5, 138.8, 140.9, 141.8, 154.2, 154.4, 154.9, 155.6, 169.8 169.9;  $m/z$  ( $ES^+$ ) 569.3038 (100,  $MNa^+$   $C_{29}H_{46}N_2O_6Si$  requires 569.3023), 447 (72,  $MH^+-Boc$ ).

**[N-Boc-[2-(dimethylphenylsilyl)-but-2-enyl]-amino]-acetic acid [1S,5R]-2-(6,6-dimethylbicyclo[3.1.1]hept-2-en-3-yl)-ethyl ester 30**

In an identical procedure to the preparation of **12** the acid derived from **14** (300 mg, 0.83 mmol) and (-)-nopol (138 mg, 0.830 mmol) gave a crude product which was purified by flash column chromatography (10% EtOAc/ pet. ether) to give **30** (309 mg, 73 %) as a colourless oil;  $\nu_{max}(\text{film})/\text{cm}^{-1}$  2976, 2917, 1752, 1701;  $\delta_H$  (400 MHz;  $CDCl_3$ ) 0.41 (6H, s,  $SiMe_2$ ), 0.82 (3H, s,  $CMe_2$ ), 1.14 (1H, d,  $J$  8.5,  $CH_2CHC=C$ ), 1.26 (3H, s,  $CMe_2$ ), 1.43-1.46 (9H, m, *Boc*), 1.64-1.67 (3H, m,  $CH_3C(H)=C$ ), 2.02-2.37 (7H, m,  $CH_2CHCH_2C=C$  +  $CH_2CHCH_2C=C$  +  $CH_2CHCH_2C=C$  +  $CO_2CH_2CH_2$ ), 3.63-4.14 (6H, m,  $CO_2CH_2$  +  $CH_2NCH_2$ ), 5.33 (1H, br s,  $C=CH$ ), 6.15-6.22 (1H, m,  $C=CHCH_3$ ), 7.27-7.35 (3H, m,  $CH_{Ar}$ ), 7.48-7.53 (2H, m,  $CH_{Ar}$ );  $\delta_C$  (100 MHz;  $CDCl_3$ ) -1.6, -1.5, 17.9, 21.0, 21.1, 26.3, 28.3, 31.3, 31.6, 35.9, 38.0, 40.7, 45.6, 46.5, 46.6, 54.2, 54.6, 63.0, 80.0, 80.1, 118.8, 118.9, 127.8, 127.9, 128.8, 128.9, 133.4, 133.5, 133.8, 138.7, 139.0, 140.8, 141.8, 143.8, 143.9, 155.1, 155.8, 170.0, 170.1;  $m/z$  ( $FAB^+$ ) 534 (3,  $MNa^+$ ), 512.3202 (11,  $MH^+$   $C_{30}H_{46}NO_4Si$  requires 512.3196), 412 (17,  $MH^+-Boc$ ), 149 (89,  $C_{11}H_{17}^+$ ), 135 (100,  $PhMe_2Si^+$ ), 57 (94,  $^tBu^+$ ).

**[*tert*-Butoxycarbonyl-[2-(dimethyl-phenyl-silyl)-but-2-enyl]-amino]-acetic acid [1R]-1-phenyl-ethyl ester 31**

In an identical procedure to the preparation of **12** the acid derived from **14** (300 mg, 0.830 mmol) and (*R*)-1-phenyl ethanol (100  $\mu$ L, 0.830 mmol, 1.0 eq.) gave a crude product which was purified by flash column chromatography (10% EtOAc/ pet. ether) to give **31** (367 mg, 95 %) as a colourless oil;  $\nu_{max}(\text{film})/\text{cm}^{-1}$  3067, 2978, 2933, 1750, 1697;  $\delta_H$  (400 MHz;  $CDCl_3$ ) 0.47 (6H, s,  $SiMe_2$ ), 1.42-1.51 (9H, m, *Boc*), 1.59 (3H, d,  $J$  6.4,  $CH_3C(H)=C$ ), 1.69 (3H, d,  $J$  6.4,  $CH_3C(H)Ph$ ), 3.86-4.14 (4H, m,  $CH_2NCH_2$ ), 6.01 (1H, q,  $J$  6.3,  $C=CHCH_3$ ), 6.14-6.30 (1H, m,  $OCH(CH_3)Ph$ ), 7.31-7.38 (8H, m,  $CH_{Ar}$ ), 7.55-7.59 (2H, m,  $CH_{Ar}$ );  $\delta_C$  (100 MHz;  $CDCl_3$ ) -1.9, -1.6, 17.7, 22.1, 28.2, 47.0, 54.2, 72.8, 80.0, 126.0, 127.0, 127.8, 128.4, 128.8, 133.5, 138.9, 140.9, 141.4, 141.7, 155.0, 169.2;  $m/z$  ( $ES^+$ ) 490.2366 (2,

MNa<sup>+</sup> C<sub>27</sub>H<sub>37</sub>NO<sub>4</sub>SiNa requires 490.2390), 368 (4, MH<sup>+</sup>-Boc), 230 (39, MH<sup>+</sup>-PhMe<sub>2</sub>Si), 73 (100, O<sup>t</sup>Bu<sup>+</sup>).

**[N-Boc-[2-(dimethylphenylsilyl)-but-2-enyl]-amino]-acetic acid [2S]-2-dibenzylamino-3-phenylpropyl ester 32**

In an identical procedure to the preparation of **12** the acid derived from **14** (300 mg, 0.830 mmol) and *N,N*-dibenzyl-(*S*)-phenylalaninol (275 mg, 0.830 mmol, 1.0 equiv.) gave a crude product which was purified by flash column chromatography (10% EtOAc/ pet. ether) to give **32** (504 mg, 90 %) as a colourless oil;  $\nu_{\max}(\text{film})/\text{cm}^{-1}$  3063, 3026, 2975, 2802, 1751, 1697;  $\delta_{\text{H}}$  (500 MHz; CDCl<sub>3</sub>) 0.45 (6H, s, SiMe<sub>2</sub>), 1.42-1.48 (9H, m, *Boc*), 1.68 (3H, d, *J* 7.7, CH<sub>3</sub>CH<sub>rot</sub>), 1.70 (3H, d, *J* 7.7, CH<sub>3</sub>CH<sub>rot</sub>), 2.72 (1H, t, *J* 9.1, CHCH<sub>2</sub>Ph<sub>rot</sub>), 2.74 (1H, t, *J* 9.1, CHCH<sub>2</sub>Ph<sub>rot</sub>), 3.00 (1H, t, *J* 6.5, CHCH<sub>2</sub>Ph<sub>rot</sub>), 3.03 (1H, t, *J* 6.5, CHCH<sub>2</sub>Ph<sub>rot</sub>), 3.19-3.26 (1H, m, CHNBn<sub>2</sub>), 3.66-4.19 (9H, m, CH<sub>2</sub>NCH<sub>2</sub> + PhCH<sub>2</sub>NCH<sub>2</sub>Ph + CO<sub>2</sub>CH<sub>2</sub>), 4.37 (1H, dd, *J* 11.3, 6.2, CO<sub>2</sub>CH<sub>2rot</sub>), 4.40 (1H, dd, *J* 11.2, 6.3, CO<sub>2</sub>CH<sub>2rot</sub>), 6.17-6.25 (1H, m, C=CHCH<sub>3</sub>), 7.06-7.08 (2H, m, CH<sub>Ar</sub>), 7.24-7.29 (13H, m, CH<sub>Ar</sub>), 7.37-7.38 (3H, m, CH<sub>Ar</sub>), 7.53-7.54 (2H, m, CH<sub>Ar</sub>);  $\delta_{\text{C}}$  (125 MHz; CDCl<sub>3</sub>) -1.6, -1.4, 17.9, 28.4, 34.5, 34.6, 46.7, 54.1, 54.4, 54.7, 58.1, 64.1, 80.2, 80.4, 126.2, 126.2, 126.9, 127.0, 127.9, 128.3, 128.4, 128.6, 128.9, 129.1, 129.4, 133.6, 133.9, 139.4, 139.7, 139.8, 140.8, 141.9, 155.1, 155.9, 170.2; *m/z* (ES<sup>+</sup>) 677.3749 (4, MH<sup>+</sup> C<sub>42</sub>H<sub>53</sub>N<sub>2</sub>O<sub>4</sub>Si requires 677.3775), 625 (100, MH<sup>+</sup>-<sup>t</sup>Bu), 585 (100, MH<sup>+</sup>-CH<sub>2</sub>Ph), 135 (27, PhMe<sub>2</sub>Si<sup>+</sup>), 91 (100, CH<sub>2</sub>Ph<sup>+</sup>).

**[N-Boc-[2-(dimethylphenylsilyl)-but-2-enyl]-amino]-acetic acid [1R,2S,4S]-1,7,7-trimethylbicyclo[2.2.1]hept-2-yl ester 33**

In an identical procedure to the preparation of **12** the acid derived from **14** (302 mg, 0.830 mmol) and (-)-endo-borneol (128 mg, 0.830 mmol) gave a crude product which was purified by flash column chromatography (10% EtOAc/ pet. ether) to give **33** (363 mg, 88 %) as a colourless oil;  $\nu_{\max}(\text{film})/\text{cm}^{-1}$  3068, 3049, 2955, 1750, 1701;  $\delta_{\text{H}}$  (500 MHz, C<sub>6</sub>D<sub>6</sub>, 67 °C) 0.52 (6H, s, SiMe<sub>2</sub>), 0.88 (6H, s, CMe<sub>2</sub>), 0.95 (3H, s, OC(H)CCH<sub>3</sub>), 1.15 (1H, dd, *J* 9.1, 3.5, OC(H)CH<sub>2</sub>), 1.33-1.36 (2H, m, CH<sub>2</sub>CH<sub>2</sub>), 1.52-1.56 (1H, m, CHCMe<sub>2</sub>), 1.56 (9H, s, *Boc*), 1.64 (3H, d, *J* 7.1, CH<sub>3</sub>C(H)=C), 1.78 (1H, m, CH<sub>2</sub>CH<sub>2</sub>), 2.14 (1H, m, CH<sub>2</sub>CH<sub>2</sub>), 2.41 (1H, m, OC(H)CH<sub>2</sub>), 3.81 (2H, br s, CH<sub>2</sub>NCH<sub>2</sub>), 4.33 (2H, br s, CH<sub>2</sub>NCH<sub>2</sub>), 5.19 (1H, ddd, *J* 9.9, 3.3, 2.1, CO<sub>2</sub>CH), 6.30 (1H, q, *J* 7.0, C=CHCH<sub>3</sub>), 7.29-7.33 (3H, m, CH<sub>Ar</sub>), 7.60-7.62 (2H, m, CH<sub>Ar</sub>);  $\delta_{\text{C}}$  (125 MHz, C<sub>6</sub>D<sub>6</sub>, 67 °C) -2.5, -2.3, 12.4, 13.7, 17.7, 18.3, 18.6, 26.5, 27.2, 27.4, 36.0, 44.3, 46.4, 46.9, 48.0, 55.8, 78.6, 79.3, 126.7, 126.9, 127.0, 132.8, 133.1, 133.5, 138.2, 139.9, 140.5, 154.3, 168.9; *m/z* (ES<sup>+</sup>) 522 (5, MNa<sup>+</sup>), 500.3167 (3, MH<sup>+</sup> C<sub>29</sub>H<sub>46</sub>NO<sub>4</sub>Si requires 500.3196), 400 (25, MH<sup>+</sup>-Boc), 135 (59, PhMe<sub>2</sub>Si<sup>+</sup>), 73 (100, O<sup>t</sup>Bu<sup>+</sup>), 57 (59, <sup>t</sup>Bu<sup>+</sup>).
